# Supplementary material for: Metal-Free Organic Chromophores Featuring an Ethynyl-Thienothiophene Linker with an n-Hexyl Chain for Translucent Dye-Sensitized Solar Cells
Source: PubMed Central journal article supplement (PMC6600718; doi:10.3390/ma12111741), 2019-05-29
Supplement: materials-12-01741-s001.pdf [file materials-12-01741-s001.pdf]

Supplementary Materials

# Metal-Free Organic Chromophores Featuring an Ethynyl-Thienothiophene Linker with an n-Hexyl Chain for Translucent Dye-Sensitized Solar Cells

Dong-Suk Lim <sup>1,†</sup>, Kwang-Won Park <sup>1,†</sup>, Alan A. Wiles <sup>2,\*</sup> and Jongin Hong <sup>1,\*</sup>

<sup>1</sup> Department of Chemistry, Chung-Ang University, Seoul 06974, Korea; dsfire89@gmail.com (D.-S.L.); bryan.kwangwon.park@gmail.com (K.-W.P.)

<sup>2</sup> WestCHEM, School of Chemistry, University of Glasgow, Glasgow G12 8QQ, UK

\* Correspondence: Alan.Wiles@glasgow.ac.uk (A.A.W.); hongj@cau.ac.kr (J.H.);  
Tel.: +441413302037 (A.A.W.); +8228205869 (J.H.)

† These authors contributed equally to this work.

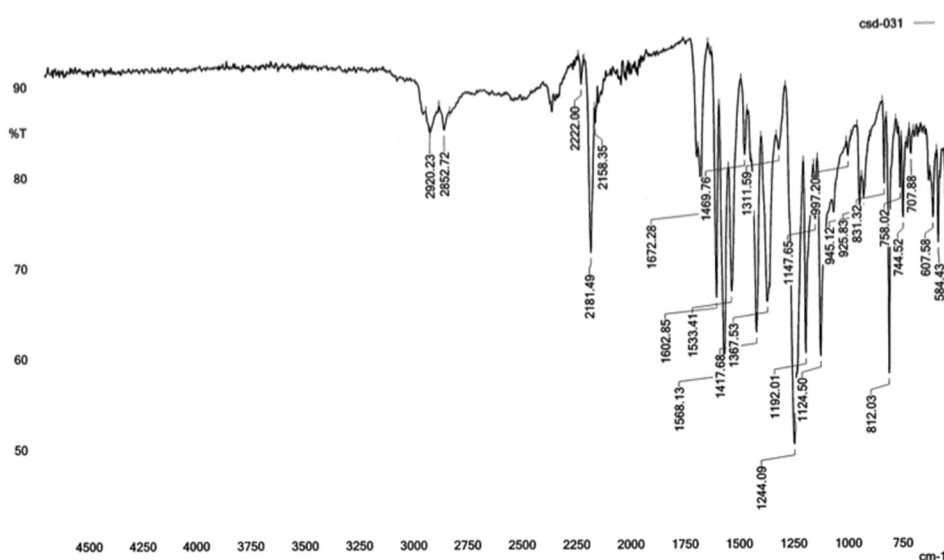

(a)

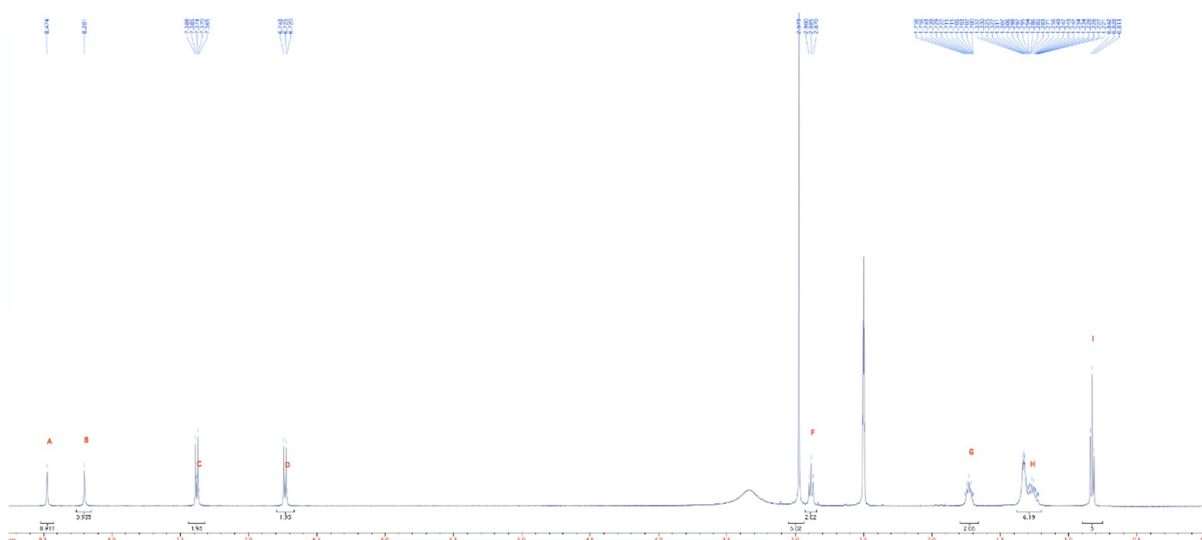

(b)

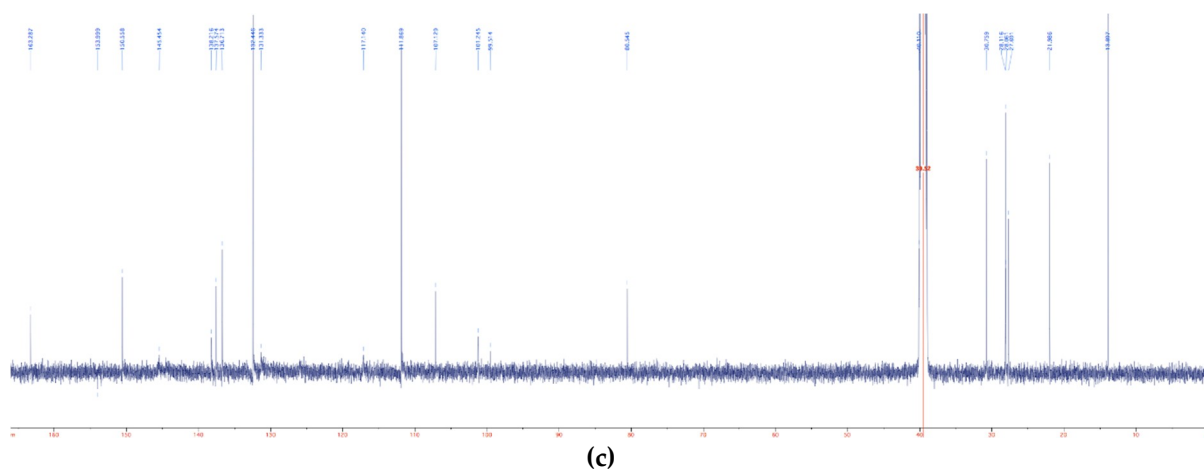

(c)

user Alan Wiles  
hsqced.gia DMSO /u alawil 34

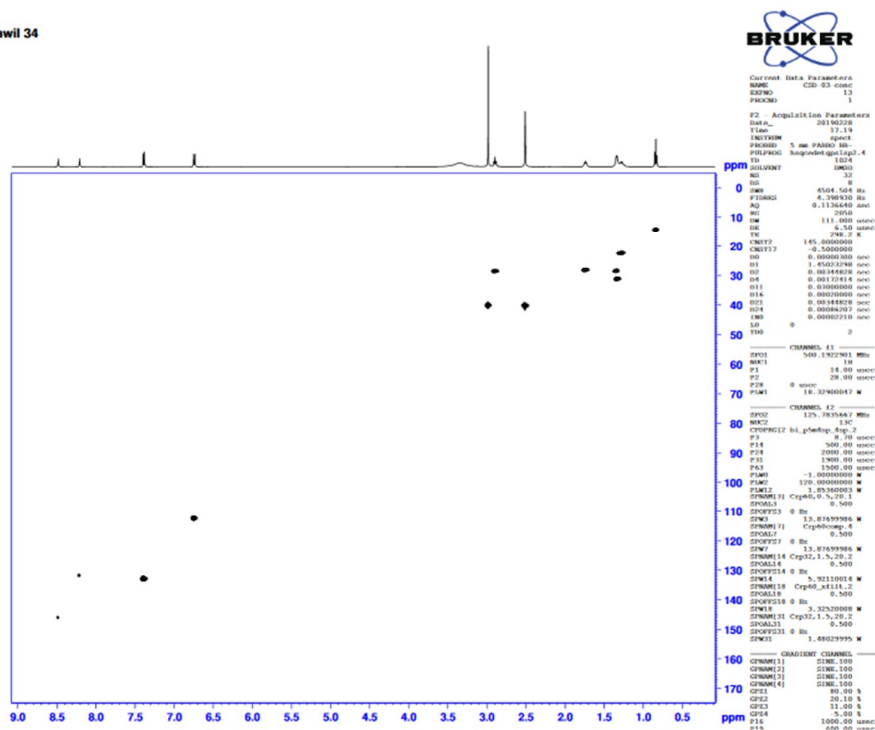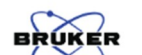

Current Data Parameters  
NAME CSD-03 conc  
EXPNO 12  
PROCNO 1  
F2 - Acquisition Parameters  
Date\_ 20190219  
Time 17.14  
INSTRUM spect  
PROBHD 5 mm PABBO BO  
PULPROG hsqcedqtcp2p\_4  
TD 1284  
SOLVENT DMSO  
NS 32  
DS 8  
SWH 4564.564 Hz  
FIDRES 0.336930 Hz  
AQ 0.1133640 sec  
RG 655  
WE 111.0800 usec  
WDW EM  
SSB 0  
LB 4.50 usec  
GB 0  
PC 1.96  
SFO 400.146400 MHz  
CNS117 -0.5000000  
NS1 0.0000000 usec  
DS1 1.4500000 usec  
RG1 0.00148479 usec  
WDW1 0.00132414 usec  
SSB1 0.00000000 usec  
LB1 0.00000000 usec  
GB1 0.00000000 usec  
PC1 1.00000000 usec  
SFO1 400.146400 MHz  
LQ 0  
TD 2  
----- CHANNEL f1 -----  
NUC1 13C  
P1 18.00 usec  
P2 28.00 usec  
P3 0 usec  
P4 18.32000047 usec  
----- CHANNEL f2 -----  
NUC2 1H  
CROSSP2 h1\_gluAg\_Ag\_2  
P1 8.70 usec  
P2 18.00 usec  
P3 2000.00 usec  
P4 18.00 usec  
P5 18.00 usec  
P6 18.00 usec  
P7 -1.00000000 usec  
P8 120.00000000 usec  
P9 1.053400003 usec  
SFO11 Cp3a5-7-7\_7 1  
SFO12 0 Hz  
SFO13 13.87499916 MHz  
SFO14 Cp3b5-6-4  
SFO15 0 Hz  
SFO16 13.87499916 MHz  
SFO17 0 Hz  
SFO18 13.87499916 MHz  
SFO19 Cp32-1-5-20-2  
SFO20 0 Hz  
SFO21 5.703100004 MHz  
SFO22 0 Hz  
SFO23 Cp32-1-5-20-2  
SFO24 0 Hz  
SFO25 1.480239995 MHz  
----- GRADIENT CHANNEL -----  
G1 100  
G2 100  
G3 100  
G4 100  
G5 100  
G6 100  
G7 100  
G8 100  
G9 100  
G10 100  
G11 100  
G12 100  
G13 100  
G14 100  
G15 100  
G16 100  
G17 100  
G18 100  
G19 100  
G20 100  
G21 100  
G22 100  
G23 100  
G24 100  
G25 100  
G26 100  
G27 100  
G28 100  
G29 100  
G30 100  
G31 100  
G32 100  
G33 100  
G34 100  
G35 100  
G36 100  
G37 100  
G38 100  
G39 100  
G40 100  
G41 100  
G42 100  
G43 100  
G44 100  
G45 100  
G46 100  
G47 100  
G48 100  
G49 100  
G50 100  
G51 100  
G52 100  
G53 100  
G54 100  
G55 100  
G56 100  
G57 100  
G58 100  
G59 100  
G60 100  
G61 100  
G62 100  
G63 100  
G64 100  
G65 100  
G66 100  
G67 100  
G68 100  
G69 100  
G70 100  
G71 100  
G72 100  
G73 100  
G74 100  
G75 100  
G76 100  
G77 100  
G78 100  
G79 100  
G80 100  
G81 100  
G82 100  
G83 100  
G84 100  
G85 100  
G86 100  
G87 100  
G88 100  
G89 100  
G90 100  
G91 100  
G92 100  
G93 100  
G94 100  
G95 100  
G96 100  
G97 100  
G98 100  
G99 100  
G100 100

(d)

Figure S1. (a) FTIR, (b) 1H NMR, (c) 13C NMR, and (d) HSQC spectra of CSD-03.

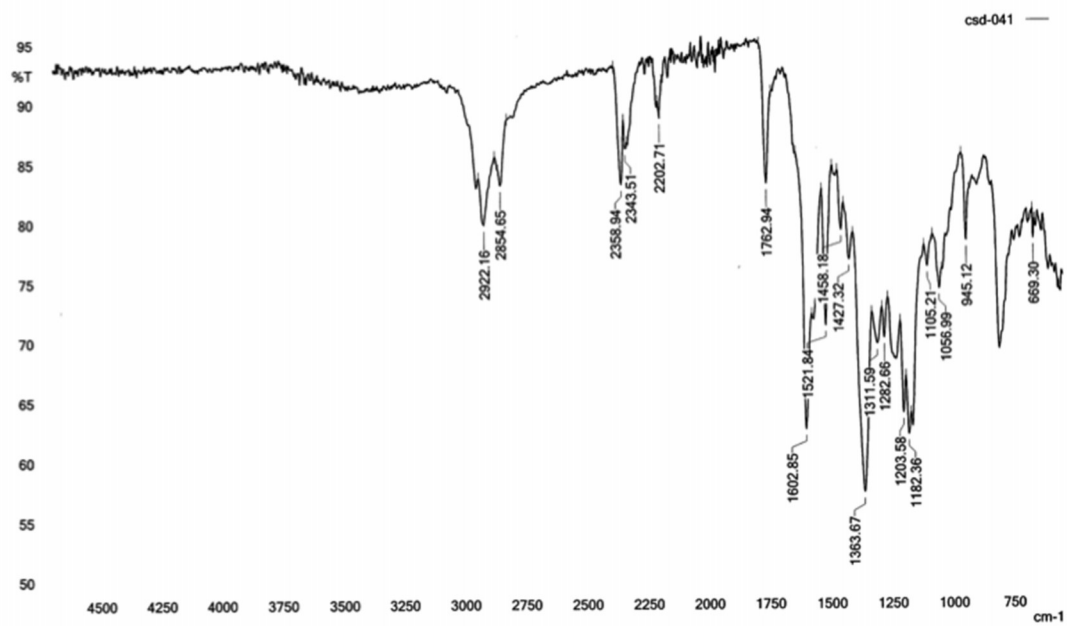

(a)

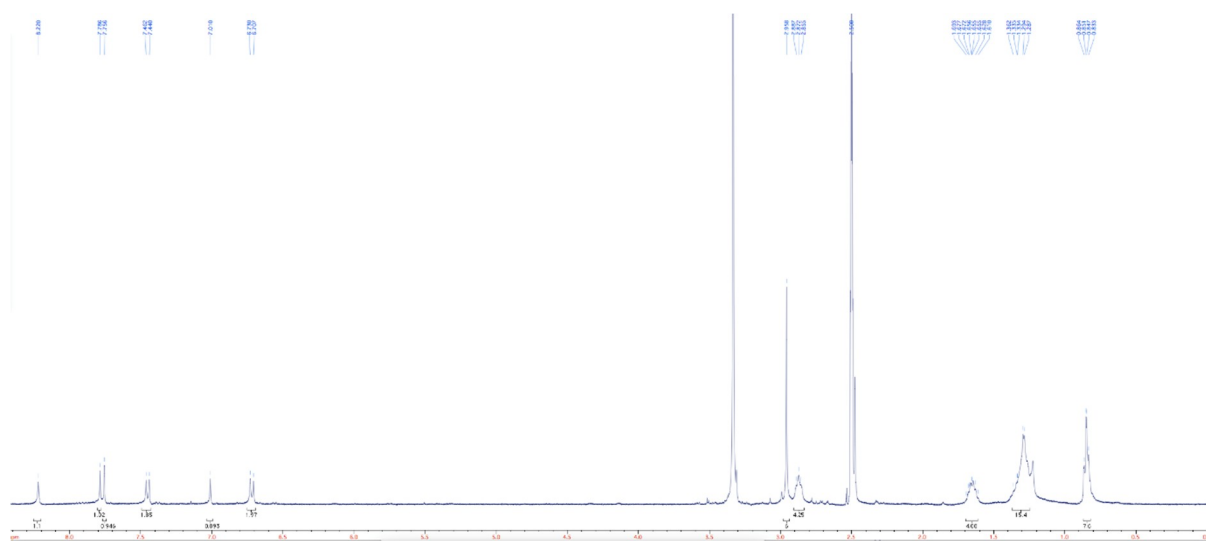

(b)

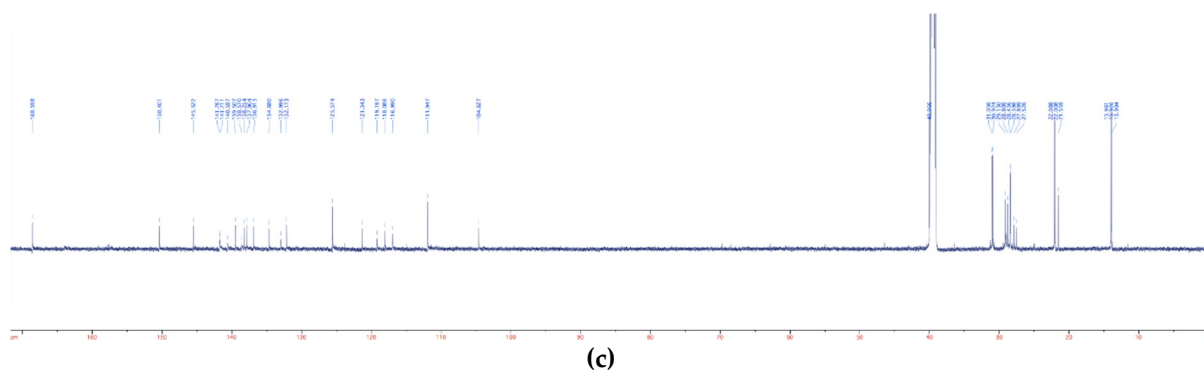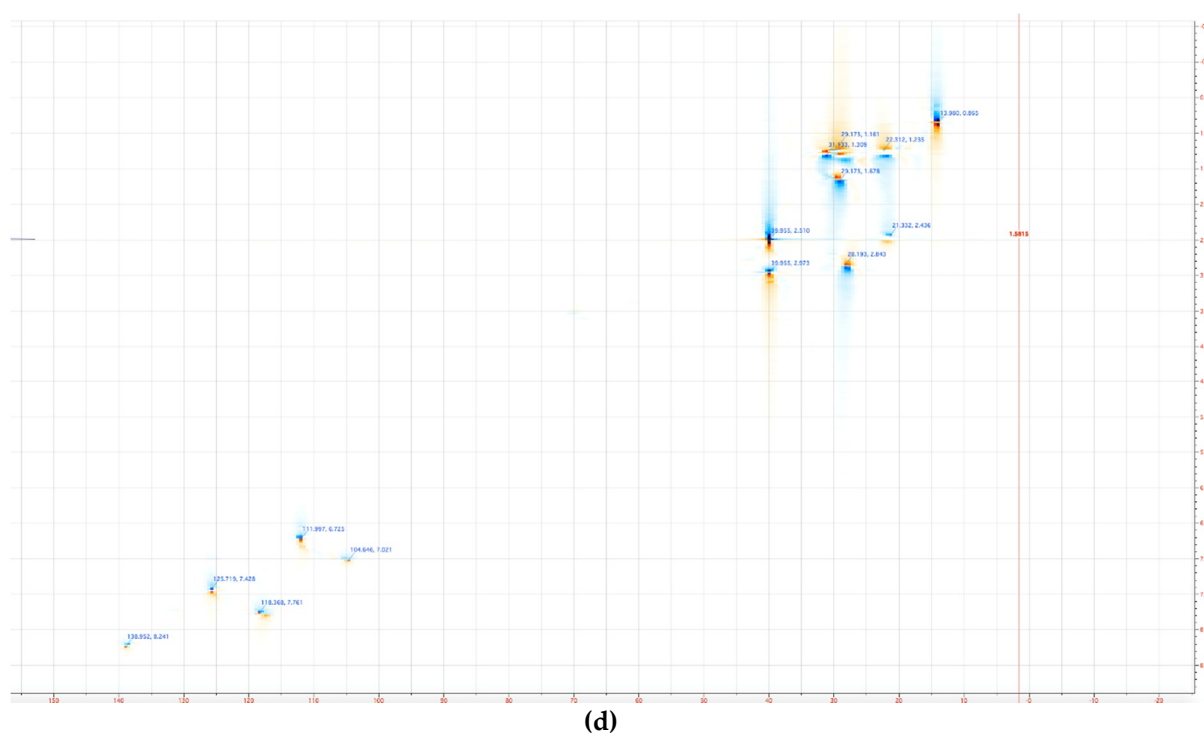

Figure S2. (a) FTIR, (b)  $^1\text{H}$  NMR, (c)  $^{13}\text{C}$  NMR, and (d) HSQC spectra of CSD-04.

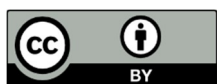

© 2019 by the authors. Submitted for possible open access publication under the terms and conditions of the Creative Commons Attribution (CC BY) license (<http://creativecommons.org/licenses/by/4.0/>).
